# Supplementary material for: Freezing and glass transition phenomena for 1,2-dichloroethane under high pressure as revealed by fluorescence spectroscopy
Source: Royal Society of Chemistry journal article supplement (doi:10.1039/c2ra00848c), 2012-01-01
Supplement: c2ra00848c.pdf [file c2ra00848c.pdf]

## SUPPORTING INFORMATION

### Freezing and Glass Transition Phenomena for 1,2-Dichloroethane Under High Pressure as Revealed by Fluorescence Spectroscopy

Mohammed A. H. Alamiry, Andrew C. Benniston, Graeme Copley and Anthony Harriman

Molecular Photonics Laboratory, School of Chemistry, Bedson Building, Newcastle University, Newcastle upon Tyne, NE1 7RU, United Kingdom.

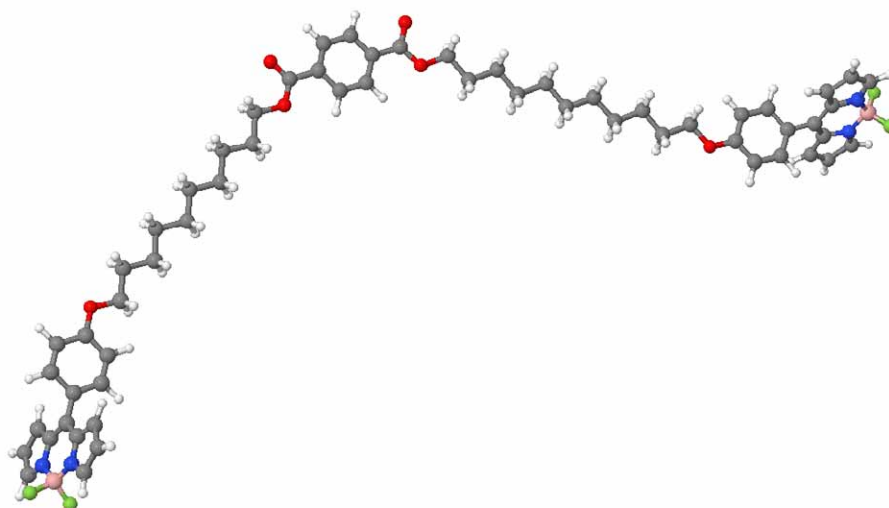

**Figure S1.** Energy-minimised geometry computed for ROBOD. The optimisation of the  $S_0$  ground-state geometries in the gas phase was performed with the density functional theory (DFT) method employing the hybrid functional B3LYP with a 6-31G(d) basis set and energy minimised as implemented in Gaussian 03.

**Table S1.** Compilation of refractive indices measured for DCE at different applied pressures and at 20 °C.

| Pressure / MPa | n (ROBOD) <sup>a</sup> | n (Michelson) <sup>b</sup> | V <sub>M</sub> / cm <sup>3</sup> mol <sup>-1</sup> |
|----------------|------------------------|----------------------------|----------------------------------------------------|
| 0              | 1.4421                 | 1.4421                     | 73.31                                              |
| 27.5           | 1.4549                 | 1.4537                     | 70.42                                              |
| 55             | 1.4653                 | 1.4635                     | 68.26                                              |
| 82.5           | 1.4761                 | 1.4740                     | 66.14                                              |
| 110            | 1.4798                 | 1.4833                     | 65.45                                              |
| 132.5          | 1.4915                 | 1.4909                     | 63.40                                              |
| 165            | 1.4978                 | 1.4967                     | 62.28                                              |
| 1925.          | 1.5030                 | 1.5037                     | 61.45                                              |
| 220            | 1.5095                 | 1.5079                     | 61.11                                              |
| 247.5          | 1.5086                 | 1.5112                     | 60.42                                              |
| 275            | 1.5166                 | 1.5156                     | 60.57                                              |
| 302.5          | 1.5163                 | 1.5184                     | 59.35                                              |
| 330            | 1.5231                 | 1.5214                     | 59.41                                              |

(a) Measured by absorption spectroscopy using ROBOD as a probe. (b) Measured by Michelson interferometry.

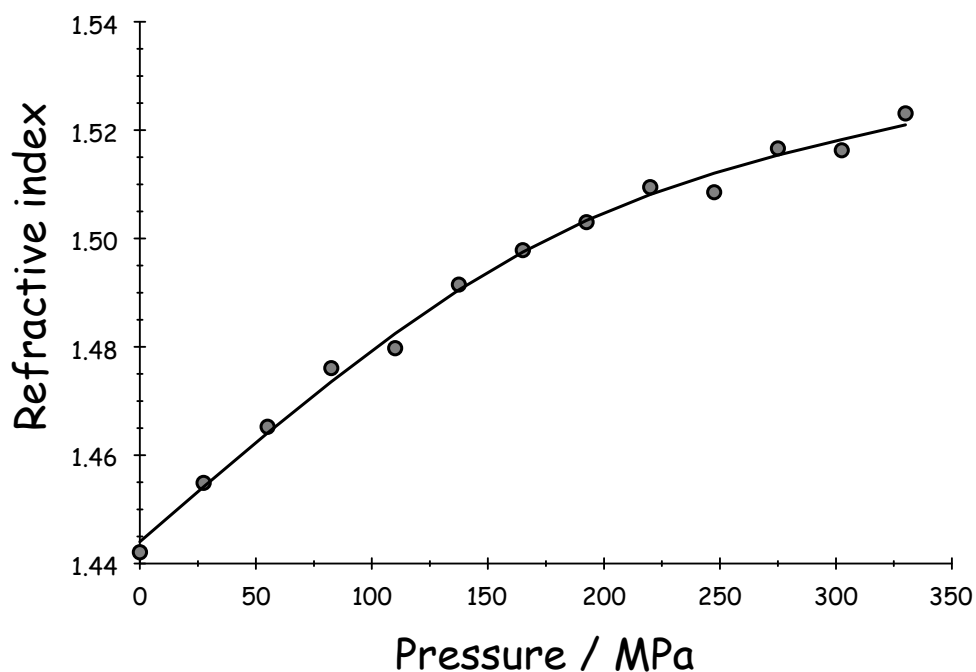

**Figure S2.** Effect of applied pressure on the refractive index measured for DCE at 20 °C.

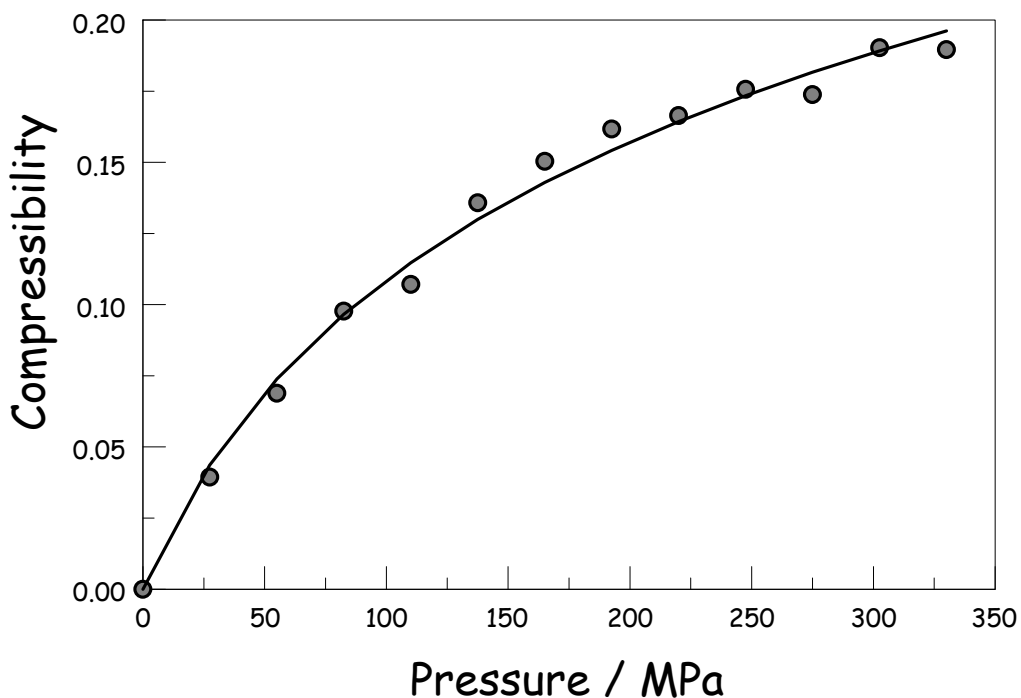

**Figure S3.** Effect of pressure on the molar volume, as expressed in terms of the compressibility. The solid line drawn through the data points is a fit to the Tait expression.

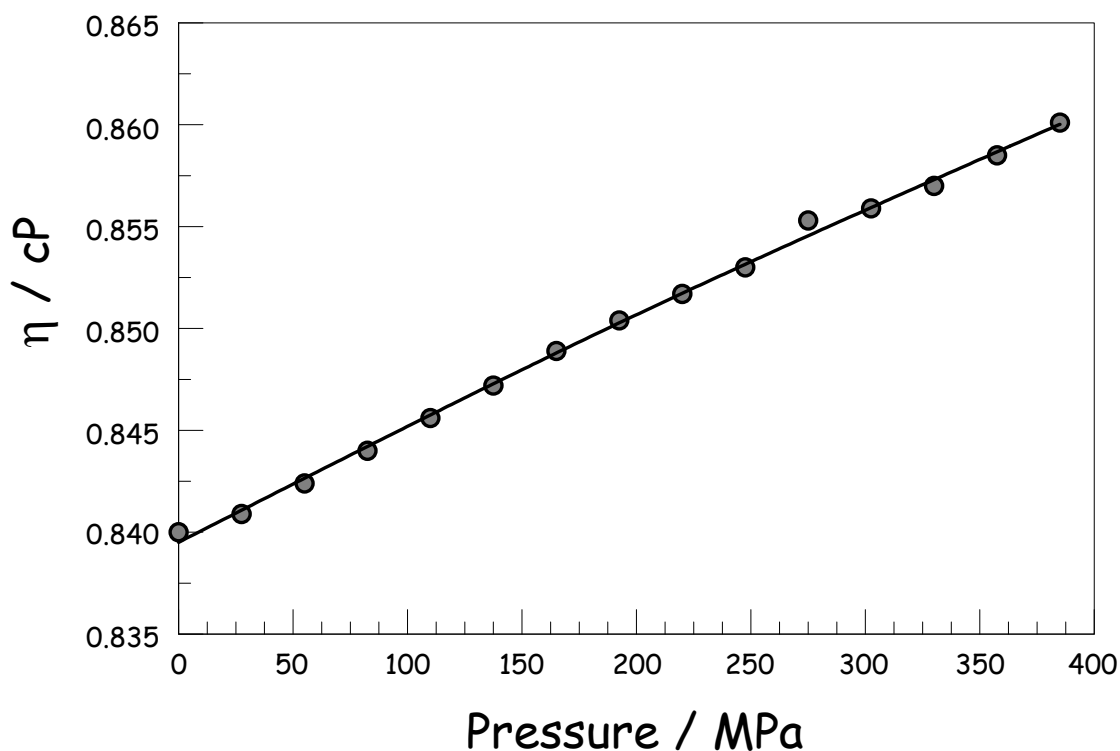

**Figure S4.** Effect of pressure on the viscosity of DCE. The solid line drawn through the data points is a fit to the Tait expression.
